# Supplementary material for: One-Class Machine-Learning Model to Screen for Dysglycemia Using Single Lead ECG in ICU, toward Noninvasive Blood Glucose Monitoring
Source: Preprints.org preprint supplement (doi:10.20944/preprints202208.0098.v1), 2022-08-04
Supplement: Supplementary file 2 [file supplementary]

| SUBJECT_ID | HADM_ID | hadm | age | sex | height(cm) | weight(kg)                 | admission_diagnosis |
|------------|---------|------|-----|-----|------------|----------------------------|---------------------|
| 12122      | 100779  | 63   | M   | 183 | 118        | TRACHEOBRONCHOMALACIA      |                     |
| 21318      | 186933  | 55   | F   | 157 | 56         | TRACHEAL LEAK;RESPIRATOR'  |                     |
| 23657      | 125544  | 32   | M   | 180 | 87         | DEHYDRATION                |                     |
| 40013      | 120406  | 59   | F   | 157 | 70.2       | CHEST PAIN                 |                     |
| 40057      | 160818  | 54   | M   | 178 | 75.5       | CORONARY ARTERY DISEASE    |                     |
| 43737      | 130527  | 68   | F   | 163 | 77         | STROKE;TRANSIENT ISCHEMIC  |                     |
| 43961      | 150566  | 39   | F   | 173 | 96         | PRE OP LIVER               |                     |
| 44059      | 198015  | 76   | F   | 165 | 86.6       | CHEST PAIN                 |                     |
| 44789      | 180262  | 68   | F   | 161 | 66.9       | SUBARACNOID HEMORRHAGE     |                     |
| 44829      | 118249  | 73   | F   | 163 | 74.3       | PNEUMONIA                  |                     |
| 46320      | 113335  | 50   | F   | 163 | 71         | T8 SPINAL CORD COMPRESSION |                     |
| 48056      | 196072  | 66   | M   |     | 106.5      | SUBARACHNOID HEMORRHAGE    |                     |
| 48388      | 156310  | 58   | M   | 188 | 89.2       | ABDOMINAL PAIN             |                     |
| 49555      | 111955  | 75   | F   | 155 | 64         | VOCAL CORD DISFUNCTION     |                     |
| 51078      | 118253  | 64   | F   |     | 72         | CHEMO                      |                     |
| 51385      | 163265  | 56   | M   | 155 | 60.6       | AORTIC VALVE VEGETATION    |                     |
| 52641      | 131760  | 80   | M   | 174 | 85         | HEART FAILURE              |                     |
| 54757      | 112220  | 41   | M   | 180 | 86         | CHOLANGIOCARCINOMA/SDA     |                     |
| 56069      | 195834  | 61   | M   |     | 114        | GASTROINTESTINAL BLEED     |                     |
| 56264      | 135431  | 81   | F   | 160 | 71         | CORONARY ARTERY DISEASE    |                     |
| 56307      | 103947  | 60   | F   | 155 | 61.8       | ALTERED MENTAL STATUS      |                     |
| 58526      | 148559  | 36   | F   |     | 92.5       | DIABETIC KETOACIDOSIS;ACU' |                     |
| 59085      | 115300  | 61   | M   | 183 | 99.1       | CORONARY ARTERY DISEASE    |                     |
| 60531      | 182932  | 51   | M   | 180 | 100.4      | BRAIN MASS                 |                     |
| 61619      | 136328  | 56   | F   | 170 | 55.4       | CARDIAC ARREST             |                     |
| 62232      | 162039  | 54   | F   |     | 64.9       | INTRACRANIAL HEMORRHAGE    |                     |
| 62795      | 173748  | 46   | F   | 168 | 79         | BACK PAIN                  |                     |
| 63961      | 160874  | 67   | F   | 165 | 75.7       | ACUTE RENAL FAILURE;JAUNE  |                     |
| 66571      | 117918  | 66   | M   | 173 | 61         | SMS OBSTRUCTION            |                     |
| 67856      | 150934  | 62   | F   | 165 | 90         | ? AORTIC DISSECTION        |                     |
| 67996      | 183522  | 51   | M   |     | 100        | INTRACRANIAL HEMORRHAGE    |                     |
| 68391      | 104896  | 68   | M   | 183 | 92.3       | CELLULITIS                 |                     |
| 68453      | 185604  | 63   | M   | 175 | 90.2       | FOURNIER'S GANGRENE        |                     |
| 72196      | 112776  | 75   | F   |     | 85.7       | SMALL BOWEL OBSTRUCTION    |                     |
| 73299      | 190596  | 54   | M   | 188 | 100        | SEPTIC SHOCK               |                     |
| 75138      | 180499  | 56   | F   | 165 | 72         | ASTHMA;CHRONIC OBST PULM   |                     |
| 76930      | 139955  |      | M   | 175 | 80         | S/P CARDIAC ARREST         |                     |
| 77220      | 134568  | 56   | M   | 178 | 93.5       | NECROTIZING PANCREATITIS   |                     |
| 77927      | 177095  |      | F   | 165 | 67         | PULMONARY INFILTRATE       |                     |
| 80209      | 152675  | 79   | M   |     | 92.3       | SEIZURE                    |                     |
| 80350      | 113374  | 67   | M   |     | 93.7       | HYDROCEPHALUS              |                     |
| 80536      | 128948  | 70   | F   | 157 | 82.1       | ACUTE RENAL FAILURE        |                     |
| 81303      | 172869  | 64   | M   | 183 | 74         | CORONARY ARTERY DISEASE    |                     |
| 81593      | 192553  | 68   | F   |     | 118.1      | URINARY TRACT INFECTION;P' |                     |
| 81636      | 145069  | 68   | M   | 163 | 50.6       | RESPIRATORY FAILURE        |                     |
| 82065      | 137855  | 40   | M   | 178 | 97         | CARDIOGENIC SHOCK          |                     |
| 83962      | 104127  | 71   | M   | 183 | 99.7       | JAUNDICE                   |                     |
| 88696      | 190494  | 74   | M   | 164 | 99         | CENTRAL CORD SYNDROME      |                     |
| 89303      | 139801  | 32   | F   | 147 | 63.5       | C SECTION,REPEAT           |                     |
| 93025      | 163620  |      | M   | 183 | 75.9       | CONGESTIVE HEART FAILURE;  |                     |

| Final diagnose | Final diagnoses_1 | Final diagnoses_2 | Final diagnoses_3 |
|----------------|-------------------|-------------------|-------------------|
| icd9_code      | 51919             | 51851             | 99731             |
| icd9_code      | 51883             | 5070              | V4611             |
| icd9_code      | 25013             | 5849              | 5856              |
| icd9_code      | 41401             | 51851             | 43491             |
| icd9_code      | 41091             | 78551             | 51881             |
| icd9_code      | 43491             | V420              | 5849              |
| icd9_code      | 57142             | 4168              | 5715              |
| icd9_code      | 41519             | 5845              | 78559             |
| icd9_code      | 430               | 43491             | 3314              |
| icd9_code      | 3849              | 78552             | 56723             |
| icd9_code      | 73008             | 3241              | 3441              |
| icd9_code      | 430               | 5180              | 37854             |
| icd9_code      | 56211             | 380               | 41511             |
| icd9_code      | 389               | 78552             | 5130              |
| icd9_code      | 28419             | 5845              | 570               |
| icd9_code      | 99661             | 3812              | 4210              |
| icd9_code      | 42823             | 5845              | 78551             |
| icd9_code      | 1551              | 56722             | 389               |
| icd9_code      | 5723              | 5722              | 45620             |
| icd9_code      | 41401             | 570               | 5845              |
| icd9_code      | 389               | 5845              | 51881             |
| icd9_code      | 25013             | 5849              | 5854              |
| icd9_code      | 42823             | 389               | 78552             |
| icd9_code      | 1300              | 3485              | 3484              |
| icd9_code      | 42741             | 41091             | 570               |
| icd9_code      | 4329              | 4019              | 2724              |
| icd9_code      | 3369              | 5845              | 5724              |
| icd9_code      | 56789             | 5724              | 7044              |
| icd9_code      | 5570              | 4474              | 51851             |
| icd9_code      | 44101             | 5184              | 51881             |
| icd9_code      | 431               | 43311             | 43331             |
| icd9_code      | 25060             | 42823             | 41071             |
| icd9_code      | 60883             | 389               | 99592             |
| icd9_code      | 5570              | 5070              | 48282             |
| icd9_code      | 389               | 78552             | 51881             |
| icd9_code      | 382               | 51884             | 481               |
| icd9_code      | 7991              | 4275              | 3481              |
| icd9_code      | 5770              | 452               | 486               |
| icd9_code      | 486               | 51881             | 42831             |
| icd9_code      | 34570             | 5845              | 5070              |
| icd9_code      | 3314              | 34830             | 53501             |
| icd9_code      | 5849              | 389               | 99592             |
| icd9_code      | 41401             | 5856              | 25041             |
| icd9_code      | 99931             | 3812              | 51881             |
| icd9_code      | 51881             | 5849              | 78550             |
| icd9_code      | 41071             | 78551             | 42821             |
| icd9_code      | 570               | 57142             | 5722              |
| icd9_code      | 95208             | 51881             | 9584              |
| icd9_code      | 64671             | 5722              | 66911             |
| icd9_code      | 383               | 42833             | 5849              |

| Final diagnoses_4 | Final diagnoses_5 |
|-------------------|-------------------|
|                   | 1120 5849         |
|                   | 51919 4786        |
|                   | 40391 58881       |
|                   | 5781 99731        |
|                   | 42741 99931       |
|                   | 3485 34292        |
| V462              | 5768              |
|                   | 2764 5854         |
|                   | 4359 2760         |
|                   | 4820 5849         |
|                   | 49121 5119        |
|                   | 25002 78060       |
|                   | 4821 99591        |
|                   | 48282 48242       |
|                   | 5734 5722         |
|                   | 99591 5856        |
|                   | 2764 2761         |
|                   | 78552 5109        |
|                   | 78559 2869        |
|                   | 78551 51852       |
|                   | 25022 5070        |
|                   | 3371 25063        |
|                   | 99592 486         |
|                   | 51881 34292       |
|                   | 78001 3481        |
|                   | 25001             |
|                   | 5185 51189        |
|                   | 53551 5762        |
|                   | 3842 48282        |
|                   | 44323 5849        |
|                   | 4375 4019         |
|                   | 486 51881         |
|                   | 78552 78559       |
|                   | 5185 78959        |
|                   | 2866 3485         |
|                   | 5849 2762         |
|                   | 42822 78001       |
|                   | 2910 5119         |
|                   | 2760 80502        |
|                   | 34830 99731       |
|                   | 5070 41519        |
|                   | 5722 452          |
|                   | 25081 40391       |
|                   | 78552 5845        |
|                   | 48242 34982       |
|                   | 43411 51881       |
|                   | 5845 2866         |
|                   | 5180 5119         |
|                   | 5724 3485         |
|                   | 51852 2760        |
