# Supplementary material for: One-Class Machine-Learning Model to Screen for Dysglycemia Using Single Lead ECG in ICU, toward Noninvasive Blood Glucose Monitoring
Source: Preprints.org preprint supplement (doi:10.20944/preprints202208.0098.v1), 2022-08-04
Supplement: Supplementary file 4 [file supplementary]

Appendix 2A.

| SUBJECT_ID | Sensitivity | Specificity | PPV  | NPV  |
|------------|-------------|-------------|------|------|
| 12122      | 0.82        | 0.85        | 0.85 | 0.83 |
| 21328      | 0.97        | 0.84        | 0.86 | 0.97 |
| 23657      | 0.92        | 0.87        | 0.88 | 0.92 |
| 40013      | 0.88        | 0.85        | 0.85 | 0.88 |
| 40057      | 1           | 0.85        | 0.87 | 1.00 |
| 43737      | 0.92        | 0.85        | 0.86 | 0.91 |
| 43961      | 0.99        | 0.86        | 0.88 | 0.99 |
| 44059      | 0.87        | 0.84        | 0.84 | 0.87 |
| 44789      | 1           | 0.83        | 0.85 | 1.00 |
| 44829      | 0.82        | 0.85        | 0.85 | 0.83 |
| 46320      | 0.97        | 0.89        | 0.90 | 0.97 |
| 48056      | 1           | 0.84        | 0.86 | 1.00 |
| 48388      | 0.91        | 0.85        | 0.86 | 0.90 |
| 49555      | 0.97        | 0.85        | 0.87 | 0.97 |
| 51078      | 0.96        | 0.86        | 0.87 | 0.96 |
| 51385      | 0.83        | 0.8         | 0.81 | 0.82 |
| 52641      | 1           | 0.65        | 0.74 | 1.00 |
| 54757      | 0.8         | 0.83        | 0.82 | 0.81 |
| 56069      | 0.98        | 0.85        | 0.87 | 0.98 |
| 56264      | 1           | 0.85        | 0.87 | 1.00 |
| 56307      | 0.994       | 0.84        | 0.86 | 0.99 |
| 58526      | 0.89        | 0.83        | 0.84 | 0.88 |
| 59085      | 0.94        | 0.81        | 0.83 | 0.93 |
| 60531      | 0.97        | 0.84        | 0.86 | 0.97 |
| 61619      | 0.99        | 0.85        | 0.87 | 0.99 |
| 62232      | 1           | 0.91        | 0.92 | 1.00 |
| 62795      | 0.8         | 0.86        | 0.85 | 0.81 |
| 63961      | 1           | 0.84        | 0.86 | 1.00 |
| 66571      | 0.9         | 0.83        | 0.84 | 0.89 |
| 67856      | 0.98        | 0.83        | 0.85 | 0.98 |
| 67996      | 1           | 0.85        | 0.87 | 1.00 |
| 68391      | 1           | 0.85        | 0.87 | 1.00 |

---

|       |      |      |      |      |
|-------|------|------|------|------|
| 68453 | 0.76 | 0.84 | 0.83 | 0.78 |
| 72196 | 0.9  | 0.82 | 0.83 | 0.89 |
| 73299 | 0.7  | 0.86 | 0.83 | 0.74 |
| 75138 | 0.99 | 0.85 | 0.87 | 0.99 |
| 76930 | 1    | 0.85 | 0.87 | 1.00 |
| 77220 | 0.7  | 0.85 | 0.82 | 0.74 |
| 77927 | 0.64 | 0.86 | 0.82 | 0.70 |
| 80209 | 0.87 | 0.86 | 0.86 | 0.87 |
| 80350 | 0.94 | 0.73 | 0.78 | 0.92 |
| 80536 | 1    | 0.85 | 0.87 | 1.00 |
| 81303 | 0.67 | 0.86 | 0.83 | 0.72 |
| 81593 | 0.96 | 0.82 | 0.84 | 0.95 |
| 81636 | 1    | 0.86 | 0.88 | 1.00 |
| 82065 | 0.92 | 0.85 | 0.86 | 0.91 |
| 83962 | 1    | 0.86 | 0.88 | 1.00 |
| 88696 | 0.99 | 0.77 | 0.81 | 0.99 |
| 89303 | 1    | 0.85 | 0.87 | 1.00 |
| 93025 | 0.98 | 0.84 | 0.86 | 0.98 |

---

Appendix 2B.

| SUBJECT_ID | Sensitivity | Specificity | PPV  | NPV  |
|------------|-------------|-------------|------|------|
| 12122      | 0.94        | 0.93        | 0.93 | 0.94 |
| 21318      | 1.00        | 0.96        | 0.96 | 1.00 |
| 23657      | 0.97        | 0.96        | 0.96 | 0.97 |
| 40013      | 0.94        | 0.99        | 0.99 | 0.94 |
| 40057      | 1.00        | 0.97        | 0.97 | 1.00 |
| 43737      | 1.00        | 0.92        | 0.93 | 1.00 |
| 43961      | 1.00        | 0.99        | 0.99 | 1.00 |
| 44059      | 0.95        | 0.96        | 0.96 | 0.95 |
| 44789      | 1.00        | 0.97        | 0.97 | 1.00 |
| 44829      | 0.98        | 0.96        | 0.96 | 0.98 |
| 46320      | 1.00        | 0.95        | 0.95 | 1.00 |
| 48056      | 1.00        | 1.00        | 1.00 | 1.00 |
| 48388      | 1.00        | 0.99        | 0.99 | 1.00 |
| 49555      | 1.00        | 0.98        | 0.98 | 1.00 |
| 51078      | 1.00        | 1.00        | 1.00 | 1.00 |
| 51385      | 0.94        | 0.98        | 0.98 | 0.94 |
| 52641      | 1.00        | 0.81        | 0.84 | 1.00 |
| 54757      | 0.87        | 0.98        | 0.98 | 0.88 |
| 56069      | 1.00        | 0.98        | 0.98 | 1.00 |
| 56264      | 1.00        | 0.97        | 0.97 | 1.00 |
| 56307      | 1.00        | 0.92        | 0.93 | 1.00 |
| 58526      | 0.97        | 0.96        | 0.96 | 0.97 |
| 59085      | 1.00        | 0.87        | 0.88 | 1.00 |
| 60531      | 1.00        | 0.97        | 0.97 | 1.00 |
| 61619      | 1.00        | 1.00        | 1.00 | 1.00 |
| 62232      | 1.00        | 1.00        | 1.00 | 1.00 |
| 62795      | 0.88        | 0.98        | 0.98 | 0.89 |
| 63961      | 1.00        | 0.97        | 0.97 | 1.00 |
| 66571      | 0.99        | 0.96        | 0.96 | 0.99 |
| 67856      | 1.00        | 0.99        | 0.99 | 1.00 |
| 67996      | 1.00        | 1.00        | 1.00 | 1.00 |
| 68391      | 1.00        | 1.00        | 1.00 | 1.00 |

---

|       |      |      |      |      |
|-------|------|------|------|------|
| 68453 | 1.00 | 0.96 | 0.96 | 1.00 |
| 72196 | 1.00 | 0.95 | 0.95 | 1.00 |
| 73299 | 0.62 | 0.92 | 0.89 | 0.71 |
| 75138 | 1.00 | 0.92 | 0.93 | 1.00 |
| 76930 | 1.00 | 1.00 | 1.00 | 1.00 |
| 77220 | 1.00 | 0.97 | 0.97 | 1.00 |
| 77927 | 0.60 | 0.92 | 0.88 | 0.70 |
| 80209 | 1.00 | 1.00 | 1.00 | 1.00 |
| 80350 | 1.00 | 0.85 | 0.87 | 1.00 |
| 80536 | 1.00 | 1.00 | 1.00 | 1.00 |
| 81303 | 0.64 | 0.91 | 0.88 | 0.72 |
| 81593 | 1.00 | 0.95 | 0.95 | 1.00 |
| 81636 | 1.00 | 0.99 | 0.99 | 1.00 |
| 82065 | 1.00 | 0.96 | 0.96 | 1.00 |
| 83962 | 1.00 | 0.97 | 0.97 | 1.00 |
| 88696 | 1.00 | 0.96 | 0.96 | 1.00 |
| 89303 | 1.00 | 0.99 | 0.99 | 1.00 |
| 93025 | 1.00 | 1.00 | 1.00 | 1.00 |

---
